# Supplementary material for: Development of a Novel Loop-Mediated Isothermal Amplification Method for the Rapid Detection of Monkeypox Virus Infections
Source: MDPI journal article supplement (doi:10.3390/v15010084), 2022-12-28
Supplement: s1 [file s1]

## **Supplementary Information**

### **Development of a Novel Loop-Mediated Isothermal Amplification Method for the Rapid Detection of Monkeypox Virus Infections**

#### **Authors:**

Chao Yu<sup>1+</sup>, Lulu Zuo<sup>1,2+</sup>, Jing Miao<sup>2,3+</sup>, Lingjing Mao<sup>2,3</sup>, Benjamin Selekon<sup>4</sup>, Ella Gonofio<sup>4</sup>, Emmanuel Nakoune<sup>4</sup>, Nicolas Berthet<sup>3,5\*</sup>, Gary Wong<sup>1\*</sup>

#### **Affiliations:**

<sup>1</sup> Viral Hemorrhagic Fevers Research Unit, CAS Key Laboratory of Molecular Virology and Immunology, Institut Pasteur of Shanghai, Chinese Academy of Sciences, Shanghai 200031, China

<sup>2</sup> University of Chinese Academy of Sciences, Beijing 100049, China

<sup>3</sup> Centre for Microbes, Development, and Health, Institut Pasteur of Shanghai, Chinese Academy of Sciences, Unit of Discovery and Molecular Characterization of Pathogens, Shanghai 200031, China

<sup>4</sup> Institut Pasteur of Bangui, Bangui, Central African Republic

<sup>5</sup> Institut Pasteur, Unité Environnement et Risque Infectieux, Cellule d'Intervention Biologique d'Urgence, Paris 75724, France

<sup>+</sup> **Co-first authors**

**\*Corresponding authors:**

Gary Wong, PhD

Viral Hemorrhagic Fevers Research Unit, CAS Key Laboratory of Molecular Virology and Immunology

Institut Pasteur of Shanghai

Chinese Academy of Sciences

Shanghai, China

E-mail: [garyckwong@ips.ac.cn](mailto:garyckwong@ips.ac.cn)

Nicolas Berthet, PharmD, PhD

Unit of Discovery and Molecular Characterization of Pathogens

The Center for Microbes, Development and Health, CAS Key Laboratory of Molecular

Virology and Immunology

Institut Pasteur of Shanghai-Chinese Academy of Sciences,

Shanghai, China

E-mail: [nicolas.berthet@pasteur.fr](mailto:nicolas.berthet@pasteur.fr)

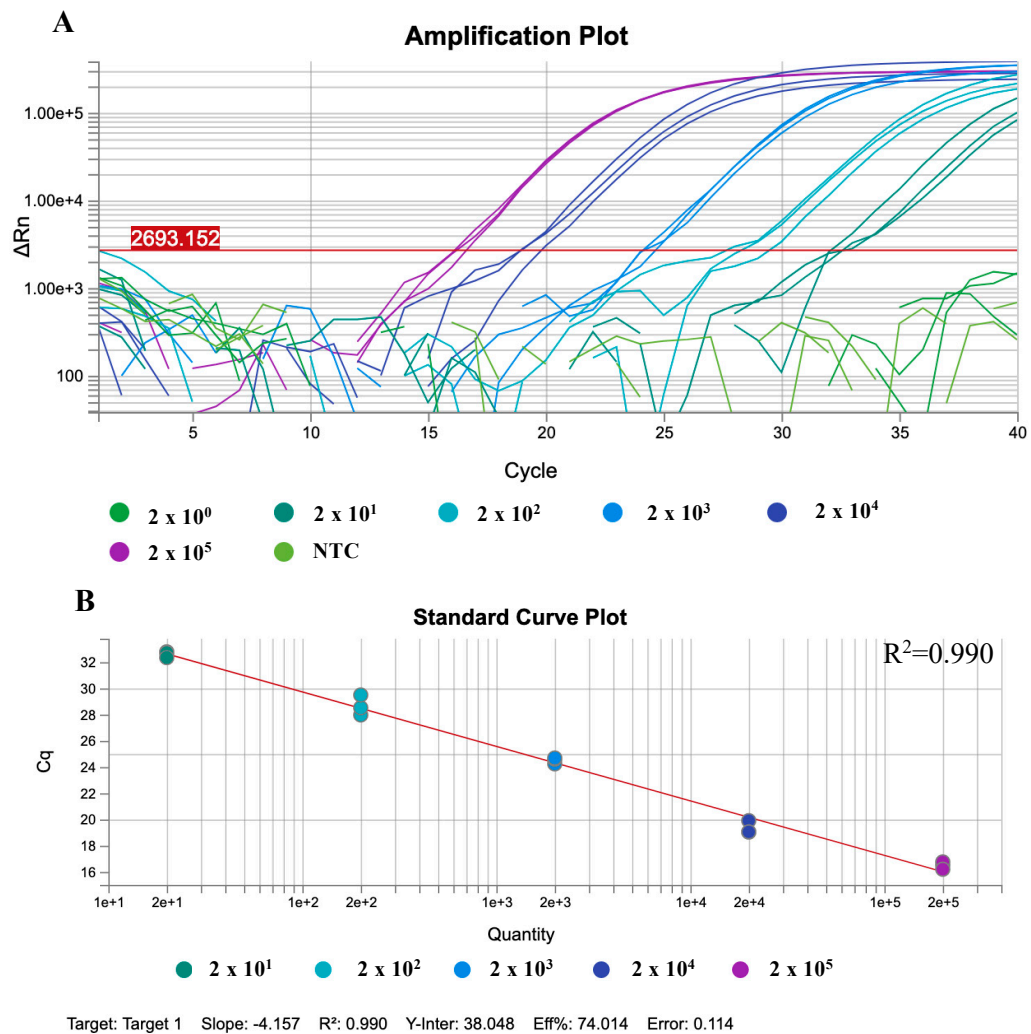

Figure S1. Sensitivity of the qPCR assay for mpox detection using DNA standard plasmid. The plasmid concentrations ranged from  $2 \times 10^5$  to  $2 \times 10^0$  copies; non-template control (NTC). (A) amplification curve of the qPCR assay. (B) Standard curve graph generated from serially diluted copies of DNA standard plasmid templates with correlation coefficient value ( $R^2 = 0.99$ ).

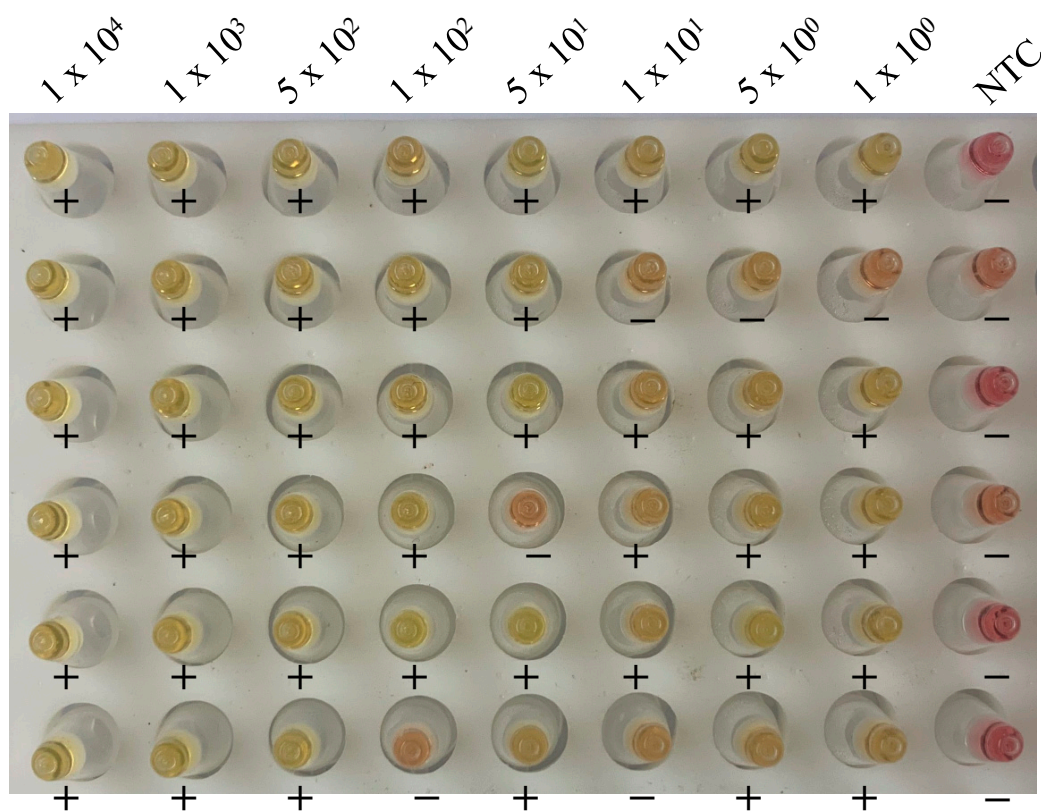

Figure S2. Limit of detection of the mpox visual LAMP assay. The limit of detection was assessed using diluted DNA standard plasmid from  $1 \times 10^4$  to  $1 \times 10^0$  copies in 8 replicates. NTC: non-template control.

Table S1. Primer sequences used for the detection of mpox via LAMP assay and qPCR.

| Primers | Sequences (5'-3')                                        | Length<br>(nt) |
|---------|----------------------------------------------------------|----------------|
| F3      | GCGAATAAGACAGTGCGATT                                     | 20             |
| B3      | TCATACAGAACATCTACAGGAT                                   | 22             |
| FIP     | GACCAAAGATCGAGGTCGTCGATGGAGTCGGTAGAT<br>TTCATG           | 42             |
| BIP     | TGGATTAGGTGTTGACTGTTATGTTCACAAATTGGTT<br>CAAGGAGAA       | 46             |
| LF      | GAAACTGCTCATCGACAGC                                      | 19             |
| LB      | CTAGAACCAGTTGTTGACAGGA                                   | 22             |
| Forward | GGAAAATGTAAAGACAACGAATACAG                               | 27             |
| Reverse | GCTATCACATAATCTGGAAGCGTA                                 | 24             |
| Probe   | FAM-AAGCCGTAATCTA<BHQ-<br>1dT>GTTGTCTATCGTGTCC-Spacer C6 | 30             |

Table S2. Detailed information of mpox biological samples used in this study.

| Sample ID | Sample Type | Real-time qPCR<br>(Ct) |   | LAMP<br>(Tp) |
|-----------|-------------|------------------------|---|--------------|
| 1         | Crusts      | 20.69                  | + | 6.84         |
| 2         | Pus         | 33.42                  | + | 10.00        |
| 3         | Crusts      | 26.33                  | + | 9.93         |
| 4         | Crusts      | 25.59                  | + | 9.17         |
| 5         | Crusts      | 31.04                  | + | 8.51         |
| 6         | Crusts      | 23.25                  | + | 7.41         |
| 7         | Pus         | 23.63                  | + | 7.00         |
| 8         | Pus         | 25.67                  | + | 9.23         |
| 9         | Pus         | 30.93                  | + | 9.11         |
| 10        | Pus         | 22.09                  | + | 6.88         |
| 11        | Pus         | 24.66                  | + | 8.12         |
| 12        | Pus         | 19.50                  | + | 6.27         |
| 13        | Pus         | 23.24                  | + | 6.97         |
| 14        | Pus         | 23.98                  | + | 7.57         |
| 15        | Serum       | 31.42                  | + | 9.56         |
